# Supplementary figures and images for: Changing trends in incidence and aetiology of childhood acute non-traumatic coma over a period of changing malaria transmission in rural coastal Kenya: a retrospective analysis
Source: HighWire-hosted journal article supplement (doi:10.1136/bmjopen-2011-000475), 2012-01-01

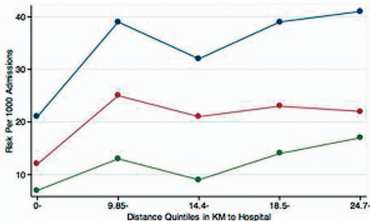

Legend:  
● All Encephalopathy  
● Slide Positive Encephalopathy  
● Slide Negative Encephalopathy

Supplement: bmjopen-2011-000475-s3.pdf [file bmjopen-2011-000475-s3.pdf]

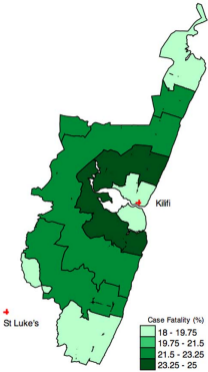

 St Luke's

 Kiffi

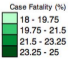

Supplement: bmjopen-2011-000475-s5.pdf [file bmjopen-2011-000475-s5.pdf]
